# Supplementary material for: In Vivo Characterization and Application of the PHA Synthase from Azotobacter vinelandii for the Biosynthesis of Polyhydroxyalkanoate Containing 4-Hydroxybutyrate
Source: MDPI journal article supplement (doi:10.3390/polym13101576), 2021-05-14
Supplement: s1 [file s1]

Supplementary Materials

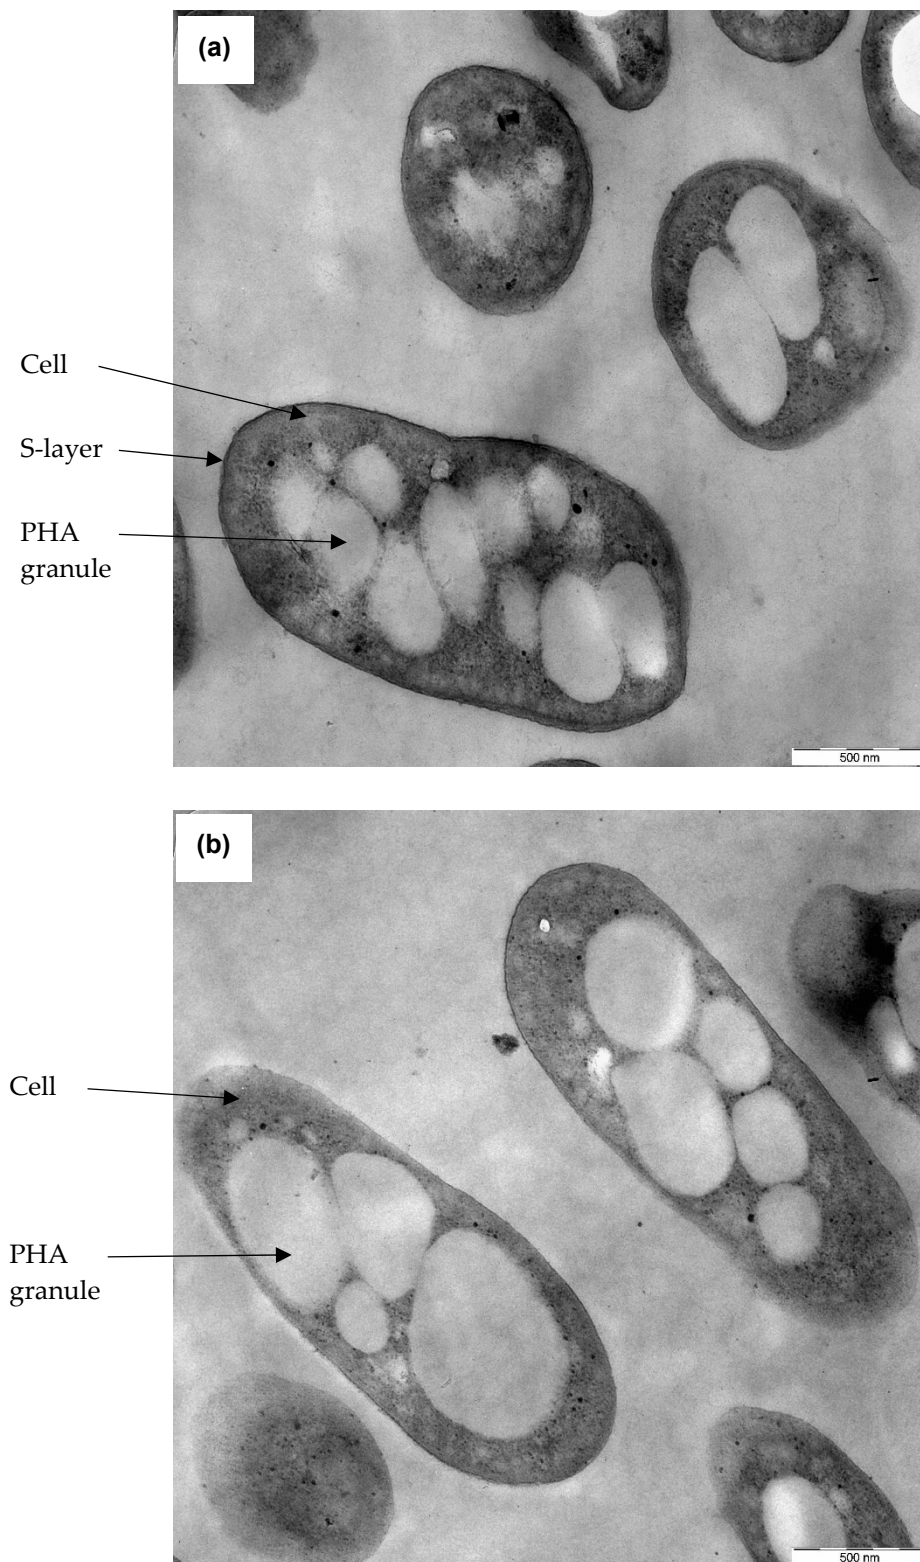

**Figure S1.** TEM micrographs *A. vinelandii* ATCC 12837 wild type strain and *A. vinelandii*  $\Delta$ *Avin\_16040* mutant strain. (a) *A. vinelandii* ATCC 12837 wild type strain and (b) *A. vinelandii*  $\Delta$ *Avin\_16040* mutant strain.

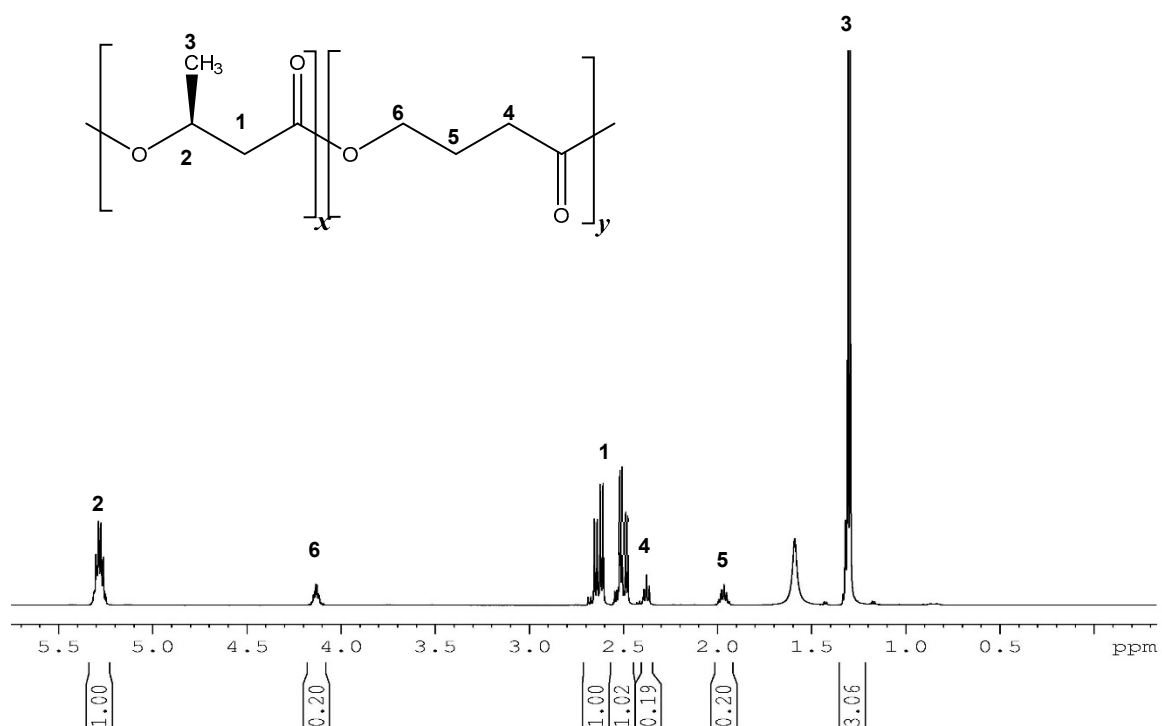

Figure S2:  $^1\text{H}$  NMR spectrum of P(3HB-co-10 mol% 4HB) produced by *A. vinelandii*  $\Delta\text{Avin}_{16040}$ . The composition of the polymer was determined by 500 MHz  $^1\text{H}$  NMR spectra. Tetramethylsilane ( $\text{Me}_4\text{Si}$ ) was used as an internal chemical shift standard.

**Table S1.** Biosynthesis of P(3HB) by *A. vinelandii*  $\Delta$ *Avin\_16040* mutant strain, *C. necator* PHB-4, and *C. necator* Re2058 harbouring *phaC* of *A. vinelandii* mutant cell using different concentrations of fructose.

| Strain                                                        | Concentration of Fructose (g/L) <sup>1</sup> | Cell Dry Weight (g/L) <sup>2</sup> | P(3HB) Content (%) <sup>3</sup> | P(3HB) Concentration (g/L) <sup>4</sup> |
|---------------------------------------------------------------|----------------------------------------------|------------------------------------|---------------------------------|-----------------------------------------|
| <i>A. vinelandii</i> $\Delta$ <i>Avin_16040</i> mutant strain | 10                                           | 1.6 $\pm$ 0 <sup>a</sup>           | 16 $\pm$ 1 <sup>a</sup>         | 0.3 $\pm$ 0 <sup>a</sup>                |
|                                                               | 20                                           | 3.6 $\pm$ 0.2 <sup>b</sup>         | 55 $\pm$ 2 <sup>b</sup>         | 2.0 $\pm$ 0.1 <sup>b</sup>              |
|                                                               | 30                                           | 4.2 $\pm$ 0.1 <sup>c</sup>         | 58 $\pm$ 1 <sup>bc</sup>        | 2.4 $\pm$ 0.1 <sup>c</sup>              |
|                                                               | 40                                           | 4.2 $\pm$ 0.1 <sup>c</sup>         | 63 $\pm$ 2 <sup>c</sup>         | 2.7 $\pm$ 0.1 <sup>c</sup>              |
|                                                               | 50                                           | 4.4 $\pm$ 0.2 <sup>c</sup>         | 60 $\pm$ 3 <sup>bc</sup>        | 2.6 $\pm$ 0.2 <sup>c</sup>              |
| <i>C. necator</i> PHB-4                                       | 10                                           | 3.7 $\pm$ 0 <sup>a</sup>           | 43 $\pm$ 0 <sup>a</sup>         | 1.6 $\pm$ 0 <sup>a</sup>                |
|                                                               | 20                                           | 7.3 $\pm$ 0.1 <sup>d</sup>         | 77 $\pm$ 1 <sup>c</sup>         | 5.6 $\pm$ 0.1 <sup>c</sup>              |
|                                                               | 30                                           | 7.5 $\pm$ 0 <sup>d</sup>           | 77 $\pm$ 1 <sup>c</sup>         | 5.8 $\pm$ 0.1 <sup>c</sup>              |
|                                                               | 40                                           | 6.9 $\pm$ 0 <sup>c</sup>           | 84 $\pm$ 1 <sup>d</sup>         | 5.8 $\pm$ 0.1 <sup>c</sup>              |
|                                                               | 50                                           | 5.7 $\pm$ 0.1 <sup>b</sup>         | 73 $\pm$ 1 <sup>b</sup>         | 4.1 $\pm$ 0.1 <sup>b</sup>              |
| <i>C. necator</i> Re2058                                      | 10                                           | 4.1 $\pm$ 0 <sup>a</sup>           | 50 $\pm$ 1 <sup>a</sup>         | 2.0 $\pm$ 0 <sup>a</sup>                |
|                                                               | 20                                           | 7.6 $\pm$ 0 <sup>d</sup>           | 77 $\pm$ 1 <sup>c</sup>         | 5.9 $\pm$ 0.1 <sup>e</sup>              |
|                                                               | 30                                           | 7.4 $\pm$ 0.1 <sup>c</sup>         | 74 $\pm$ 1 <sup>b</sup>         | 5.4 $\pm$ 0 <sup>d</sup>                |
|                                                               | 40                                           | 7.1 $\pm$ 0.1 <sup>c</sup>         | 73 $\pm$ 1 <sup>b</sup>         | 5.2 $\pm$ 0 <sup>c</sup>                |
|                                                               | 50                                           | 6.9 $\pm$ 0 <sup>b</sup>           | 73 $\pm$ 1 <sup>b</sup>         | 5.0 $\pm$ 0.1 <sup>b</sup>              |

Data shown are means of triplicate. The superscripts represent the significant difference of the data using statistical analysis ( $P < 0.05$ ). Superscript alphabets in each column for each bacterial strain that are different indicate a significant difference.

<sup>1</sup> Cells were cultivated in MMPHA at 30 °C, 200 rpm for 48 h with different concentrations of fructose and 0.54 g/L of urea as nitrogen source.

<sup>2</sup> Cell dry weight was obtained after freeze-drying process.

<sup>3</sup> P(3HB) content of freeze-dried cells was determined using gas chromatography.

<sup>4</sup> P(3HB) concentration = cell dry weight \* [P(3HB) content/100].
